# Supplementary material for: Proteomic Analysis of the Meniscus Cartilage in Osteoarthritis
Source: MDPI journal article supplement (doi:10.3390/ijms22158181), 2021-07-30
Supplement: s1 [file s1]

**Supplementary Table S1.** Top 20 proteins dominantly identified in both lateral and medial meniscal tissues by TMT analysis.

| Uniprot ID | DESCRIPTION                                         | Gene name | SPEC_COUNT | SEQ_COUNT | Medial to Lateral Ratio (log2) | ECM related Protein |
|------------|-----------------------------------------------------|-----------|------------|-----------|--------------------------------|---------------------|
| P02768     | Serum albumin                                       | ALB       | 3609       | 126       | -0.08                          |                     |
| P49747     | Cartilage oligomeric matrix protein                 | COMP      | 857        | 83        | -0.62                          | v                   |
| P08670     | Vimentin                                            | VIM       | 811        | 63        | -0.36                          |                     |
| P02675     | Fibrinogen beta chain                               | FGB       | 423        | 49        | 3.43                           |                     |
| P51888     | Prolargin                                           | PRELP     | 376        | 42        | -0.31                          | v                   |
| P02787     | Serotransferrin                                     | TF        | 318        | 66        | -0.04                          |                     |
| P10909     | Clusterin                                           | CLU       | 311        | 34        | 0.01                           |                     |
| P63261     | Actin, cytoplasmic 2                                | ACTG1     | 277        | 40        | -0.13                          |                     |
| P02751     | Fibronectin                                         | FN1       | 261        | 85        | 1.23                           | v                   |
| P01009     | Alpha-1-antitrypsin                                 | SERPINA1  | 240        | 44        | -0.01                          | v                   |
| P01857     | Ig gamma-1 chain C region                           | IGHG1     | 230        | 29        | 0.23                           |                     |
| P12111     | Collagen alpha-3(VI) chain                          | COL6A3    | 229        | 105       | -0.26                          | v                   |
| O75339     | Cartilage intermediate layer protein 1              | CILP      | 215        | 60        | -0.61                          | v                   |
| P01024     | Complement C3                                       | C3        | 210        | 99        | 0.07                           |                     |
| P07585     | Decorin                                             | DCN       | 207        | 35        | -0.54                          | v                   |
| Q09666     | Neuroblast differentiation-associated protein AHNAK | AHNAK     | 204        | 135       | -0.24                          |                     |
| P16112     | Aggrecan core protein                               | ACAN      | 187        | 39        | -0.11                          | v                   |
| P06733     | Alpha-enolase                                       | ENO1      | 184        | 36        | 0.30                           |                     |
| P01834     | Ig kappa chain C region                             | IGKC      | 177        | 13        | 0.24                           |                     |
| P68871     | Hemoglobin subunit beta                             | HBB       | 169        | 24        | 1.13                           |                     |
