# Supplementary material for: Proteomic Analysis of the Meniscus Cartilage in Osteoarthritis
Source: MDPI journal article supplement (doi:10.3390/ijms22158181), 2021-07-30
Supplement: s1 [file s1]

**Supplementary Table S5. Current researches in pairwise comparison of the L/M OA knee**

| PMID          | Year | Target  | Samples                                                                                                       | OA<br>(L/M) | Control<br>(L/M) |
|---------------|------|---------|---------------------------------------------------------------------------------------------------------------|-------------|------------------|
| 31249374[1]   | 2019 | gene    | multipotential stromal cells from lateral/ medial condyles                                                    | 17/17       | Not performed    |
| 33178674[2]   | 2020 | gene    | synovial fluid multipotent stromal cells from lateral/ medial knee of OA and following knee joint distraction | 21/21       | Not performed    |
| 32407894[3]   | 2020 | protein | lateral/medial menisci                                                                                        | 7/ 9        | 7/ 9             |
| Current study |      | protein | lateral/medial menisci                                                                                        | 12/12       | Not performed    |

1. Sanjurjo-Rodriguez, C.; Baboolal, T. G.; Burska, A. N.; Ponchel, F.; El-Jawhari, J. J.; Pandit, H.; McGonagle, D.; Jones, E., Gene expression and functional comparison between multipotential stromal cells from lateral and medial condyles of knee osteoarthritis patients. *Scientific reports* **2019**, 9, (1), 9321.
2. Sanjurjo-Rodriguez, C.; Altaie, A.; Mastbergen, S.; Baboolal, T.; Welting, T.; Lafeber, F.; Pandit, H.; McGonagle, D.; Jones, E., Gene Expression Signatures of Synovial Fluid Multipotent Stromal Cells in Advanced Knee Osteoarthritis and Following Knee Joint Distraction. *Frontiers in bioengineering and biotechnology* **2020**, 8, 579751.
3. Folkesson, E.; Turkiewicz, A.; Ali, N.; Ryden, M.; Hughes, H. V.; Tjornstrand, J.; Onnerfjord, P.; Englund, M., Proteomic comparison of osteoarthritic and reference human menisci using data-independent acquisition mass spectrometry. *Osteoarthritis and cartilage* **2020**, 28, (8), 1092-1101.
