# Supplementary material for: Proteomic Analysis of the Meniscus Cartilage in Osteoarthritis
Source: MDPI journal article supplement (doi:10.3390/ijms22158181), 2021-07-30
Supplement: s1 [file s1]

**Supplementary Table S3. The MRM transitions of 119 ECM proteins**

| Gene name | Peptide sequence     | Targetion    | Light         |               | Heavy        |               | CE          |
|-----------|----------------------|--------------|---------------|---------------|--------------|---------------|-------------|
|           |                      |              | Q1 Mass (Da)  | Q3 Mass (Da)  | Q1 Mass (Da) | Q3 Mass (Da)  |             |
| COL11A2   | GANEDELSPETSPYVK     | +2y9         | <b>868.4</b>  | <b>1007.5</b> | <b>872.4</b> | <b>1015.5</b> | <b>40.1</b> |
|           |                      | +2y8         | 868.4         | 920.5         | 872.4        | 928.5         | 40.1        |
|           |                      | +2b8         | 868.4         | 816.3         | 872.4        | 816.3         | 40.1        |
| COL12A1   | DLSFSEVTSYGFK        | +2y7         | 740.4         | 801.4         | 744.4        | 809.4         | 35.5        |
|           |                      | <b>+2y6</b>  | <b>740.4</b>  | <b>702.3</b>  | <b>744.4</b> | <b>710.4</b>  | <b>35.5</b> |
|           |                      | +2y5         | 740.4         | 601.3         | 744.4        | 609.3         | 35.5        |
| COL14A1   | IGILITDGK            | +2y6         | 465.3         | 646.4         | 469.3        | 654.4         | 25.6        |
|           |                      | <b>+2y5</b>  | <b>465.3</b>  | <b>533.3</b>  | <b>469.3</b> | <b>541.3</b>  | <b>25.6</b> |
|           |                      | +2y4         | 465.3         | 420.2         | 469.3        | 428.2         | 25.6        |
| COL15A1   | GGVLFAITDAFQK        | <b>+2y8</b>  | <b>683.9</b>  | <b>893.5</b>  | <b>687.9</b> | <b>901.5</b>  | <b>33.5</b> |
|           |                      | +2y7         | 683.9         | 822.4         | 687.9        | 830.5         | 33.5        |
|           |                      | +2y6         | 683.9         | 709.4         | 687.9        | 717.4         | 33.5        |
| COL18A1   | TEAPSATGQASSLLGGR    | <b>+2y11</b> | <b>801.9</b>  | <b>1046.6</b> | <b>806.9</b> | <b>1056.6</b> | <b>37.7</b> |
|           |                      | +2y10        | 801.9         | 945.5         | 806.9        | 955.5         | 37.7        |
|           |                      | +2b2         | 801.9         | 231.1         | 806.9        | 231.1         | 37.7        |
| COL1A1    | GVQGPPGPAGPR         | <b>+2y9</b>  | <b>545.3</b>  | <b>805.4</b>  | <b>550.3</b> | <b>815.4</b>  | <b>28.5</b> |
|           |                      | +2y8         | 545.3         | 748.4         | 550.3        | 758.4         | 28.5        |
|           |                      | +2y7         | 545.3         | 651.4         | 550.3        | 661.4         | 28.5        |
| COL1A2    | GPAGPSGPAGK          | +2y9         | 448.2         | 741.4         | 452.2        | 749.4         | 25          |
|           |                      | <b>+2y8</b>  | <b>448.2</b>  | <b>670.4</b>  | <b>452.2</b> | <b>678.4</b>  | <b>25</b>   |
|           |                      | +2y7         | 448.2         | 613.3         | 452.2        | 621.3         | 25          |
| COL3A1    | NGETGPQGPPGPTGPGGDK  | <b>+2y12</b> | <b>860.4</b>  | <b>1036.5</b> | <b>864.4</b> | <b>1044.5</b> | <b>39.8</b> |
|           |                      | +2y11        | 860.4         | 979.5         | 864.4        | 987.5         | 39.8        |
|           |                      | +2y7         | 860.4         | 631.3         | 864.4        | 639.3         | 39.8        |
| COL6A1    | VFSVAITPDHLEPR       | +2y9         | 790.9         | 1077.6        | 795.9        | 1087.6        | 37.3        |
|           |                      | +2y8         | 790.9         | 964.5         | 795.9        | 974.5         | 37.3        |
|           |                      | <b>+2y7</b>  | <b>790.9</b>  | <b>863.4</b>  | <b>795.9</b> | <b>873.4</b>  | <b>37.3</b> |
| COL6A2    | YGGLHFSDQVEVFSPPGSDR | <b>+2y8</b>  | <b>1097.5</b> | <b>862.4</b>  | <b>735.3</b> | <b>872.4</b>  | <b>48.4</b> |
|           |                      | +3b8         | 732.0         | 877.4         | 735.3        | 877.4         | 37.4        |
|           |                      | +3b9         | 732.0         | 1005.4        | 735.3        | 1005.4        | 37.4        |
| COL6A3    | ALNLGYALDYAQR        | <b>+2y9</b>  | <b>734.4</b>  | <b>1056.5</b> | <b>739.4</b> | <b>1066.5</b> | <b>35.3</b> |
|           |                      | +2y7         | 734.4         | 836.4         | 739.4        | 846.4         | 35.3        |
|           |                      | +2y5         | 734.4         | 652.3         | 739.4        | 662.3         | 35.3        |
| ABI3BP    | FTEAIVDAEPK          | +2y9         | 610.3         | 971.5         | 614.3        | 979.5         | 30.8        |
|           |                      | +2y6         | 610.3         | 658.3         | 614.3        | 666.4         | 30.8        |
|           |                      | <b>+2y2</b>  | <b>610.3</b>  | <b>244.2</b>  | <b>614.3</b> | <b>252.2</b>  | <b>30.8</b> |
| AEBP1     | YLSPDATVSTEVR        | <b>+2y10</b> | <b>719.4</b>  | <b>1074.5</b> | <b>724.4</b> | <b>1084.6</b> | <b>34.8</b> |
|           |                      | +2y7         | 719.4         | 791.4         | 724.4        | 801.4         | 34.8        |

|               |                            |              |              |              |              |               |             |
|---------------|----------------------------|--------------|--------------|--------------|--------------|---------------|-------------|
|               |                            | +2y5         | 719.4        | 591.3        | 724.4        | 601.3         | 34.8        |
|               |                            | +2y5         | 595.3        | 587.3        | 600.3        | 597.3         | 30.3        |
| <b>CILP</b>   | <b>LFNLDVPESR</b>          | <b>+2y4</b>  | <b>595.3</b> | <b>488.2</b> | <b>600.3</b> | <b>498.3</b>  | <b>30.3</b> |
|               |                            | +2y2         | 595.3        | 262.2        | 600.3        | 272.2         | 30.3        |
|               |                            | +2y8         | 652.3        | 816.4        | 657.3        | 826.4         | 32.3        |
| <b>CILP2</b>  | <b>DLTSAASAPSDLR</b>       | +2y7         | 652.3        | 745.4        | 657.3        | 755.4         | 32.3        |
|               |                            | <b>+2y5</b>  | <b>652.3</b> | <b>587.3</b> | <b>657.3</b> | <b>597.3</b>  | <b>32.3</b> |
|               |                            | <b>+2y9</b>  | <b>807.4</b> | <b>992.5</b> | <b>812.4</b> | <b>1002.5</b> | <b>37.9</b> |
| <b>COMP</b>   | <b>NALWHTGDTESQVR</b>      | +2y8         | 807.4        | 891.4        | 812.4        | 901.4         | 37.9        |
|               |                            | +2y6         | 807.4        | 719.4        | 812.4        | 729.4         | 37.9        |
|               |                            | +2y7         | 643.3        | 898.4        | 648.3        | 908.5         | 32          |
| <b>EFEMP1</b> | <b>SGNENGEFYLR</b>         | <b>+2y6</b>  | <b>643.3</b> | <b>784.4</b> | <b>648.3</b> | <b>794.4</b>  | <b>32</b>   |
|               |                            | +2y4         | 643.3        | 598.3        | 648.3        | 608.3         | 32          |
|               |                            | +2y7         | 589.8        | 857.4        | 594.8        | 867.4         | 30.1        |
| <b>FBLN1</b>  | <b>TGYFDFGISR</b>          | <b>+2y6</b>  | <b>589.8</b> | <b>694.4</b> | <b>594.8</b> | <b>704.4</b>  | <b>30.1</b> |
|               |                            | +2y5         | 589.8        | 547.3        | 594.8        | 557.3         | 30.1        |
|               |                            | <b>+2y6</b>  | <b>565.2</b> | <b>700.3</b> | <b>570.3</b> | <b>710.4</b>  | <b>29.2</b> |
| <b>FBLN2</b>  | <b>GNEEGYFGTR</b>          | +2y4         | 565.2        | 480.3        | 570.3        | 490.3         | 29.2        |
|               |                            | +2y3         | 565.2        | 333.2        | 570.3        | 343.2         | 29.2        |
|               |                            | +2y9         | 662.3        | 932.5        | 666.3        | 940.5         | 32.7        |
| <b>FBN1</b>   | <b>DYLSGELGDNLK</b>        | +2y8         | 662.3        | 845.4        | 666.3        | 853.5         | 32.7        |
|               |                            | <b>+2b2</b>  | <b>662.3</b> | <b>279.1</b> | <b>666.3</b> | <b>279.1</b>  | <b>32.7</b> |
|               |                            | +2y9         | 797.4        | 973.5        | 801.4        | 981.5         | 37.6        |
| <b>FGA</b>    | <b>HPDEAAFFDTASTGK</b>     | +2y6         | 797.4        | 564.3        | 801.4        | 572.3         | 37.6        |
|               |                            | <b>+2b2</b>  | <b>797.4</b> | <b>235.1</b> | <b>801.4</b> | <b>235.1</b>  | <b>37.6</b> |
|               |                            | +2y8         | 768.4        | 903.5        | 772.4        | 911.5         | 36.5        |
| <b>FGB</b>    | <b>AHYGGFTVQNEANK</b>      | +2y6         | 768.4        | 703.3        | 772.4        | 711.4         | 36.5        |
|               |                            | <b>+2b3</b>  | <b>768.4</b> | <b>372.2</b> | <b>772.4</b> | <b>372.2</b>  | <b>36.5</b> |
|               |                            | +2y8         | 746.4        | 928.5        | 751.4        | 938.5         | 35.7        |
| <b>FGG</b>    | <b>YEASILTHDSSIR</b>       | <b>+2y7</b>  | <b>746.4</b> | <b>815.4</b> | <b>751.4</b> | <b>825.4</b>  | <b>35.7</b> |
|               |                            | +2y6         | 746.4        | 714.4        | 751.4        | 724.4         | 35.7        |
|               |                            | +2y8         | 678.4        | 966.5        | 683.4        | 976.5         | 33.3        |
| <b>FN1</b>    | <b>IYLYTLNDNAR</b>         | <b>+2y7</b>  | <b>678.4</b> | <b>803.4</b> | <b>683.4</b> | <b>813.4</b>  | <b>33.3</b> |
|               |                            | +2y5         | 678.4        | 589.3        | 683.4        | 599.3         | 33.3        |
|               |                            | <b>+2y10</b> | <b>927.4</b> | <b>974.5</b> | <b>932.4</b> | <b>984.5</b>  | <b>42.2</b> |
| <b>FNDC1</b>  | <b>TPHSGAAEEDSSASAPPSR</b> | +2b10        | 927.4        | 995.4        | 932.4        | 995.4         | 42.2        |
|               |                            | +2b11        | 927.4        | 1082.4       | 932.4        | 1082.4        | 42.2        |
|               |                            | +2y8         | 657.8        | 868.5        | 662.8        | 878.5         | 32.5        |
| <b>IGFALS</b> | <b>DFALQNPSAVPR</b>        | +2y7         | 657.8        | 740.4        | 662.8        | 750.4         | 32.5        |
|               |                            | <b>+2y6</b>  | <b>657.8</b> | <b>626.4</b> | <b>662.8</b> | <b>636.4</b>  | <b>32.5</b> |
|               |                            | <b>+2y8</b>  | <b>773.4</b> | <b>858.4</b> | <b>778.4</b> | <b>868.5</b>  | <b>36.7</b> |
| <b>LAMC1</b>  | <b>NTIEETGNLAEQAR</b>      | +2y5         | 773.4        | 574.3        | 778.4        | 584.3         | 36.7        |

|               |                           |              |               |               |               |               |             |
|---------------|---------------------------|--------------|---------------|---------------|---------------|---------------|-------------|
|               |                           | +2y4         | 773.4         | 503.3         | 778.4         | 513.3         | 36.7        |
|               |                           | <b>+2y8</b>  | <b>495.3</b>  | <b>819.4</b>  | <b>500.3</b>  | <b>829.5</b>  | <b>26.7</b> |
| <b>LRG1</b>   | <b>VAAGAFQGLR</b>         | +2y7         | 495.3         | 748.4         | 500.3         | 758.4         | 26.7        |
|               |                           | +2y5         | 495.3         | 620.4         | 500.3         | 630.4         | 26.7        |
|               |                           | +2y8         | 510.3         | 774.4         | 515.3         | 784.4         | 27.2        |
| <b>LTBP2</b>  | <b>SSAAGEGTLAR</b>        | <b>+2y7</b>  | <b>510.3</b>  | <b>703.4</b>  | <b>515.3</b>  | <b>713.4</b>  | <b>27.2</b> |
|               |                           | +2y3         | 510.3         | 359.2         | 515.3         | 369.2         | 27.2        |
|               |                           | +2y8         | 582.8         | 895.5         | 586.8         | 903.5         | 29.8        |
| <b>MATN2</b>  | <b>VGLLQYGSTVK</b>        | <b>+2y7</b>  | <b>582.8</b>  | <b>782.4</b>  | <b>586.8</b>  | <b>790.4</b>  | <b>29.8</b> |
|               |                           | +2y6         | 582.8         | 654.3         | 586.8         | 662.4         | 29.8        |
|               |                           | <b>+2y9</b>  | <b>1043.5</b> | <b>1062.6</b> | <b>1048.5</b> | <b>1072.6</b> | <b>46.4</b> |
| <b>MFGE8</b>  | <b>NAVHVNLFETPVEAQYVR</b> | +2y8         | 1043.5        | 961.5         | 1048.5        | 971.5         | 46.4        |
|               |                           | +2b9         | 1043.5        | 1024.5        | 1048.5        | 1024.5        | 46.4        |
|               |                           | +2y6         | 638.3         | 728.4         | 643.3         | 738.4         | 31.8        |
| <b>MGP</b>    | <b>NANTFISPQQR</b>        | <b>+2y5</b>  | <b>638.3</b>  | <b>615.3</b>  | <b>643.3</b>  | <b>625.3</b>  | <b>31.8</b> |
|               |                           | +2y4         | 638.3         | 528.3         | 643.3         | 538.3         | 31.8        |
|               |                           | +2y7         | 547.8         | 908.5         | 551.8         | 916.5         | 28.6        |
| <b>MXRA5</b>  | <b>WFLEWDAK</b>           | +2y6         | 547.8         | 761.4         | 551.8         | 769.4         | 28.6        |
|               |                           | <b>+2y5</b>  | <b>547.8</b>  | <b>648.3</b>  | <b>551.8</b>  | <b>656.3</b>  | <b>28.6</b> |
|               |                           | <b>+2y10</b> | <b>829.4</b>  | <b>967.5</b>  | <b>834.4</b>  | <b>977.5</b>  | <b>38.7</b> |
| <b>PCOLCE</b> | <b>YDALEVFAAGSGTSGQR</b>  | +2y9         | 829.4         | 820.4         | 834.4         | 830.4         | 38.7        |
|               |                           | +2y8         | 829.4         | 749.4         | 834.4         | 759.4         | 38.7        |
|               |                           | <b>+2y8</b>  | <b>917.9</b>  | <b>1022.5</b> | <b>921.9</b>  | <b>1030.5</b> | <b>41.9</b> |
| <b>POSTN</b>  | <b>FIEGGDGHLFEDEEIK</b>   | +2y7         | 917.9         | 909.4         | 921.9         | 917.4         | 41.9        |
|               |                           | +2b8         | 917.9         | 813.4         | 921.9         | 813.4         | 41.9        |
|               |                           | <b>+2y8</b>  | <b>772.4</b>  | <b>968.5</b>  | <b>777.4</b>  | <b>978.5</b>  | <b>36.7</b> |
| <b>SMOC1</b>  | <b>FSEPDPSHTLEER</b>      | +2y2         | 772.4         | 304.2         | 777.4         | 314.2         | 36.7        |
|               |                           | +2b5         | 772.4         | 576.2         | 777.4         | 576.2         | 36.7        |
|               |                           | <b>+2y8</b>  | <b>755.4</b>  | <b>968.5</b>  | <b>760.4</b>  | <b>978.5</b>  | <b>36.1</b> |
| <b>SMOC2</b>  | <b>LSEPDPSHTLEER</b>      | +2y2         | 755.4         | 304.2         | 760.4         | 314.2         | 36.1        |
|               |                           | +2b5         | 755.4         | 542.2         | 760.4         | 542.2         | 36.1        |
|               |                           | <b>+2y8</b>  | <b>648.4</b>  | <b>843.4</b>  | <b>653.4</b>  | <b>853.4</b>  | <b>32.2</b> |
| <b>SRPX2</b>  | <b>LLHISAPDSPNR</b>       | +2y7         | 648.4         | 756.4         | 653.4         | 766.4         | 32.2        |
|               |                           | +2y6         | 648.4         | 685.3         | 653.4         | 695.3         | 32.2        |
|               |                           | +2y7         | 540.3         | 851.5         | 544.3         | 859.5         | 28.3        |
| <b>TGFBI</b>  | <b>DLLNNHILK</b>          | <b>+2y6</b>  | <b>540.3</b>  | <b>738.4</b>  | <b>544.3</b>  | <b>746.4</b>  | <b>28.3</b> |
|               |                           | +2b8         | 540.3         | 933.5         | 544.3         | 933.5         | 28.3        |
|               |                           | +2y9         | 651.9         | 960.5         | 655.9         | 968.6         | 32.3        |
| <b>THBS1</b>  | <b>AGTLDLSLTVQGK</b>      | <b>+2y7</b>  | <b>651.9</b>  | <b>732.4</b>  | <b>655.9</b>  | <b>740.4</b>  | <b>32.3</b> |
|               |                           | +2y5         | 651.9         | 532.3         | 655.9         | 540.3         | 32.3        |
|               |                           | +2y8         | 700.4         | 1012.6        | 705.4         | 1022.6        | 34.1        |
| <b>THBS2</b>  | <b>GTTQIDPNWVIR</b>       | +2y7         | 700.4         | 899.5         | 705.4         | 909.5         | 34.1        |

|               |                          |              |              |               |              |               |             |
|---------------|--------------------------|--------------|--------------|---------------|--------------|---------------|-------------|
|               |                          | <b>+2y6</b>  | <b>700.4</b> | <b>784.4</b>  | <b>705.4</b> | <b>794.5</b>  | <b>34.1</b> |
|               |                          | +2y7         | 623.8        | 893.5         | 627.8        | 901.5         | 31.3        |
| <b>THBS4</b>  | <b>KPQDFLEELK</b>        | +2y4         | 623.8        | 518.3         | 627.8        | 526.3         | 31.3        |
|               |                          | <b>+2b8</b>  | <b>623.8</b> | <b>987.5</b>  | <b>627.8</b> | <b>987.5</b>  | <b>31.3</b> |
|               |                          | +2y7         | 967.5        | 860.5         | 971.5        | 868.5         | 43.7        |
| <b>TNC</b>    | <b>DLQVSETAETSLTLLWK</b> | <b>+2y6</b>  | <b>967.5</b> | <b>773.5</b>  | <b>971.5</b> | <b>781.5</b>  | <b>43.7</b> |
|               |                          | +2y3         | 967.5        | 446.3         | 971.5        | 454.3         | 43.7        |
|               |                          | <b>+2y7</b>  | <b>607.8</b> | <b>786.4</b>  | <b>612.8</b> | <b>796.4</b>  | <b>30.7</b> |
| <b>TNXB</b>   | <b>EVTVQGLEPSR</b>       | +2y4         | 607.8        | 488.2         | 612.8        | 498.3         | 30.7        |
|               |                          | +2y3         | 607.8        | 359.2         | 612.8        | 369.2         | 30.7        |
|               |                          | <b>+2y10</b> | <b>823.9</b> | <b>1076.5</b> | <b>828.9</b> | <b>1086.5</b> | <b>38.5</b> |
| <b>VTN</b>    | <b>DVWGIEGPIDAAFTR</b>   | +2y9         | 823.9        | 947.5         | 828.9        | 957.5         | 38.5        |
|               |                          | +2y8         | 823.9        | 890.5         | 828.9        | 900.5         | 38.5        |
|               |                          | <b>+2y8</b>  | <b>584.8</b> | <b>926.5</b>  | <b>589.8</b> | <b>936.5</b>  | <b>29.9</b> |
| <b>ACAN</b>   | <b>LEGEVFFATR</b>        | +2y6         | 584.8        | 740.4         | 589.8        | 750.4         | 29.9        |
|               |                          | +2y5         | 584.8        | 641.3         | 589.8        | 651.3         | 29.9        |
|               |                          | +2y9         | 990.1        | 1010.6        | 994.1        | 1018.6        | 44.5        |
| <b>ASPEN</b>  | <b>LYLSHNQLSEIPLNLPK</b> | <b>+2y6</b>  | <b>990.1</b> | <b>681.4</b>  | <b>994.1</b> | <b>689.4</b>  | <b>44.5</b> |
|               |                          | +2b8         | 990.1        | 969.5         | 994.1        | 969.5         | 44.5        |
|               |                          | +2y9         | 791.5        | 1033.6        | 795.5        | 1041.6        | 37.3        |
| <b>BGN</b>    | <b>GLQHLYALVLVNNK</b>    | <b>+2b5</b>  | <b>791.5</b> | <b>549.3</b>  | <b>795.5</b> | <b>549.3</b>  | <b>37.3</b> |
|               |                          | +2b9         | 791.5        | 995.6         | 795.5        | 995.6         | 37.3        |
|               |                          | <b>+2y10</b> | <b>683.4</b> | <b>1010.5</b> | <b>687.4</b> | <b>1018.5</b> | <b>33.5</b> |
| <b>CHAD</b>   | <b>NQLSSYPSAALSK</b>     | +2y9         | 683.4        | 923.5         | 687.4        | 931.5         | 33.5        |
|               |                          | +2y7         | 683.4        | 673.4         | 687.4        | 681.4         | 33.5        |
|               |                          | <b>+2y8</b>  | <b>624.9</b> | <b>884.6</b>  | <b>628.9</b> | <b>892.6</b>  | <b>31.4</b> |
| <b>DCN</b>    | <b>NLHALILVNNK</b>       | +2y7         | 624.9        | 813.5         | 628.9        | 821.5         | 31.4        |
|               |                          | +2y6         | 624.9        | 700.4         | 628.9        | 708.4         | 31.4        |
|               |                          | +2y7         | 629.8        | 869.4         | 634.8        | 879.4         | 31.5        |
| <b>FMOD</b>   | <b>LYLDHNNLTR</b>        | <b>+2y6</b>  | <b>629.8</b> | <b>754.4</b>  | <b>634.8</b> | <b>764.4</b>  | <b>31.5</b> |
|               |                          | +2y5         | 629.8        | 617.3         | 634.8        | 627.3         | 31.5        |
|               |                          | +2y8         | 565.3        | 816.4         | 569.3        | 824.5         | 29.2        |
| <b>HAPLN1</b> | <b>DPTAFGSGIHK</b>       | <b>+2y7</b>  | <b>565.3</b> | <b>745.4</b>  | <b>569.3</b> | <b>753.4</b>  | <b>29.2</b> |
|               |                          | +2y6         | 565.3        | 598.3         | 569.3        | 606.3         | 29.2        |
|               |                          | <b>+2y6</b>  | <b>584.3</b> | <b>741.4</b>  | <b>589.3</b> | <b>751.4</b>  | <b>29.9</b> |
| <b>HSPG2</b>  | <b>AFAHLQVPER</b>        | +2y5         | 584.3        | 628.3         | 589.3        | 638.4         | 29.9        |
|               |                          | +2b7         | 584.3        | 767.4         | 589.3        | 767.4         | 29.9        |
|               |                          | +2y7         | 649.3        | 853.5         | 653.3        | 861.5         | 32.2        |
| <b>LUM</b>    | <b>SLEDLQLTHNK</b>       | +2y5         | 649.3        | 612.3         | 653.3        | 620.4         | 32.2        |
|               |                          | <b>+2y4</b>  | <b>649.3</b> | <b>499.3</b>  | <b>653.3</b> | <b>507.3</b>  | <b>32.2</b> |
|               |                          | <b>+2y9</b>  | <b>907.0</b> | <b>1015.6</b> | <b>911.0</b> | <b>1023.6</b> | <b>41.5</b> |
| <b>OGN</b>    | <b>LSLLEELSLAENQLLK</b>  | +2y7         | 907.0        | 815.5         | 911.0        | 823.5         | 41.5        |

|              |                          |             |               |               |               |               |             |
|--------------|--------------------------|-------------|---------------|---------------|---------------|---------------|-------------|
|              |                          | +2y6        | 907.0         | 744.4         | 911.0         | 752.4         | 41.5        |
|              |                          | +2y8        | 575.3         | 923.5         | 579.3         | 931.5         | 29.6        |
| <b>OMD</b>   | <b>LLLGYNEISK</b>        | <b>+2y7</b> | <b>575.3</b>  | <b>810.4</b>  | <b>579.3</b>  | <b>818.4</b>  | <b>29.6</b> |
|              |                          | +2y6        | 575.3         | 753.4         | 579.3         | 761.4         | 29.6        |
|              |                          | +2y9        | 830.9         | 1042.6        | 834.9         | 1050.6        | 38.8        |
| <b>PRELP</b> | <b>LSDGVFKPDTFHGLK</b>   | +2y8        | 830.9         | 914.5         | 834.9         | 922.5         | 38.8        |
|              |                          | <b>+2y6</b> | <b>830.9</b>  | <b>702.4</b>  | <b>834.9</b>  | <b>710.4</b>  | <b>38.8</b> |
|              |                          | +2y6        | 826.0         | 699.4         | 831.0         | 709.4         | 38.6        |
| <b>PRG4</b>  | <b>GLPNVVTSAISLPNIR</b>  | +2y5        | 826.0         | 612.4         | 831.0         | 622.4         | 38.6        |
|              |                          | <b>+2y4</b> | <b>826.0</b>  | <b>499.3</b>  | <b>831.0</b>  | <b>509.3</b>  | <b>38.6</b> |
|              |                          | <b>+2y8</b> | <b>657.9</b>  | <b>930.5</b>  | <b>662.9</b>  | <b>940.5</b>  | <b>32.5</b> |
| <b>VCAN</b>  | <b>LATVGELQAAWR</b>      | +2y4        | 657.9         | 503.3         | 662.9         | 513.3         | 32.5        |
|              |                          | +2y2        | 657.9         | 361.2         | 662.9         | 371.2         | 32.5        |
|              |                          | <b>+2y9</b> | <b>802.9</b>  | <b>978.5</b>  | <b>806.9</b>  | <b>986.5</b>  | <b>37.8</b> |
| <b>A2M</b>   | <b>IAQWQSFQLEGGLK</b>    | +2y4        | 802.9         | 374.2         | 806.9         | 382.3         | 37.8        |
|              |                          | +2b3        | 802.9         | 313.2         | 806.9         | 313.2         | 37.8        |
|              |                          | +2y9        | 634.9         | 956.6         | 638.9         | 964.6         | 31.7        |
| <b>AGT</b>   | <b>ALQDQLVLVAAK</b>      | <b>+2y3</b> | <b>634.9</b>  | <b>289.2</b>  | <b>638.9</b>  | <b>297.2</b>  | <b>31.7</b> |
|              |                          | +2b9        | 634.9         | 980.6         | 638.9         | 980.6         | 31.7        |
|              |                          | +2y4        | 511.3         | 565.3         | 516.3         | 575.3         | 27.3        |
| <b>AMBP</b>  | <b>ETLLQDFR</b>          | +2y3        | 511.3         | 437.2         | 516.3         | 447.2         | 27.3        |
|              |                          | <b>+2y2</b> | <b>511.3</b>  | <b>322.2</b>  | <b>516.3</b>  | <b>332.2</b>  | <b>27.3</b> |
|              |                          | +2y6        | 927.5         | 708.4         | 932.5         | 718.4         | 42.2        |
| <b>CD109</b> | <b>SPVTLTAYIVTSSLGYR</b> | <b>+2b2</b> | <b>927.5</b>  | <b>185.1</b>  | <b>932.5</b>  | <b>185.1</b>  | <b>42.2</b> |
|              |                          | +2b3        | 927.5         | 284.2         | 932.5         | 284.2         | 42.2        |
|              |                          | <b>+2y9</b> | <b>663.9</b>  | <b>1012.5</b> | <b>667.9</b>  | <b>1020.6</b> | <b>32.8</b> |
| <b>CSTB</b>  | <b>SQVVAGTNYFIK</b>      | +2y8        | 663.9         | 913.5         | 667.9         | 921.5         | 32.8        |
|              |                          | +2y7        | 663.9         | 842.4         | 667.9         | 850.5         | 32.8        |
|              |                          | +2y8        | 521.8         | 856.6         | 525.8         | 864.6         | 27.6        |
| <b>CTSD</b>  | <b>VSTLPAITLK</b>        | <b>+2y6</b> | <b>521.8</b>  | <b>642.4</b>  | <b>525.8</b>  | <b>650.4</b>  | <b>27.6</b> |
|              |                          | +2b2        | 521.8         | 187.1         | 525.8         | 187.1         | 27.6        |
|              |                          | +2y7        | 609.3         | 830.4         | 614.3         | 840.4         | 30.8        |
| <b>CTSZ</b>  | <b>NSWGEPWGER</b>        | <b>+2y5</b> | <b>609.3</b>  | <b>644.3</b>  | <b>614.3</b>  | <b>654.3</b>  | <b>30.8</b> |
|              |                          | +2b3        | 609.3         | 388.2         | 614.3         | 388.2         | 30.8        |
|              |                          | <b>+2y8</b> | <b>1015.0</b> | <b>1055.6</b> | <b>1020.0</b> | <b>1065.6</b> | <b>45.4</b> |
| <b>F12</b>   | <b>NKPGVYTDVAYYLAWIR</b> | +2y7        | 1015.0        | 984.5         | 1020.0        | 994.5         | 45.4        |
|              |                          | +2b8        | 1015.0        | 875.4         | 1020.0        | 875.4         | 45.4        |
|              |                          | +2y10       | 846.4         | 1083.5        | 850.4         | 1091.6        | 39.3        |
| <b>F13A1</b> | <b>DGTHVVENVDATHIGK</b>  | +2y6        | 846.4         | 626.4         | 850.4         | 634.4         | 39.3        |
|              |                          | <b>+2b5</b> | <b>846.4</b>  | <b>510.2</b>  | <b>850.4</b>  | <b>510.2</b>  | <b>39.3</b> |
|              |                          | <b>+2y8</b> | <b>781.4</b>  | <b>1072.5</b> | <b>786.4</b>  | <b>1082.5</b> | <b>37</b>   |
| <b>F2</b>    | <b>TATSEYQTFFNPR</b>     | +2y7        | 781.4         | 909.5         | 786.4         | 919.5         | 37          |

|                 |                            |              |               |               |               |               |             |
|-----------------|----------------------------|--------------|---------------|---------------|---------------|---------------|-------------|
|                 |                            | +2y4         | 781.4         | 533.3         | 786.4         | 543.3         | 37          |
|                 |                            | <b>+2y9</b>  | <b>912.9</b>  | <b>1001.5</b> | <b>917.0</b>  | <b>1009.5</b> | <b>41.7</b> |
| <b>HRG</b>      | <b>ADLFYDVEALDLESPK</b>    | +2y6         | 912.9         | 688.4         | 917.0         | 696.4         | 41.7        |
|                 |                            | +2y3         | 912.9         | 331.2         | 917.0         | 339.2         | 41.7        |
|                 |                            | +2y8         | 599.3         | 920.5         | 603.3         | 928.5         | 30.4        |
| <b>HTRA1</b>    | <b>YNFIADVVEK</b>          | +2y6         | 599.3         | 660.4         | 603.3         | 668.4         | 30.4        |
|                 |                            | <b>+2b2</b>  | <b>599.3</b>  | <b>278.1</b>  | <b>603.3</b>  | <b>278.1</b>  | <b>30.4</b> |
|                 |                            | +2y9         | 1003.5        | 973.5         | 1008.5        | 983.5         | 45          |
| <b>ITIH1</b>    | <b>FAHYVVTSQVVNTANEAR</b>  | +2y8         | 1003.5        | 874.4         | 1008.5        | 884.4         | 45          |
|                 |                            | <b>+2y7</b>  | <b>1003.5</b> | <b>775.4</b>  | <b>1008.5</b> | <b>785.4</b>  | <b>45</b>   |
|                 |                            | <b>+2y8</b>  | <b>902.9</b>  | <b>1019.5</b> | <b>907.9</b>  | <b>1029.5</b> | <b>41.4</b> |
| <b>ITIH2</b>    | <b>AEDHFSVIDFNQIR</b>      | +2y6         | 902.9         | 791.4         | 907.9         | 801.4         | 41.4        |
|                 |                            | +2b7         | 902.9         | 786.3         | 907.9         | 786.3         | 41.4        |
|                 |                            | +2y5         | 937.9         | 697.4         | 942.9         | 707.4         | 42.6        |
| <b>KNG1</b>     | <b>YNSQNSNNQFVLYR</b>      | +2y4         | 937.9         | 550.3         | 942.9         | 560.3         | 42.6        |
|                 |                            | <b>+2y3</b>  | <b>937.9</b>  | <b>451.3</b>  | <b>942.9</b>  | <b>461.3</b>  | <b>42.6</b> |
|                 |                            | <b>+2y8</b>  | <b>687.9</b>  | <b>919.5</b>  | <b>692.9</b>  | <b>929.5</b>  | <b>33.6</b> |
| <b>MMP2</b>     | <b>QDIVFDGIAQIR</b>        | +2y6         | 687.9         | 657.4         | 692.9         | 667.4         | 33.6        |
|                 |                            | +2y4         | 687.9         | 487.3         | 692.9         | 497.3         | 33.6        |
|                 |                            | +2y8         | 597.8         | 966.5         | 602.8         | 976.5         | 30.4        |
| <b>MMP3</b>     | <b>LDSDTLEVM[Oxi]R</b>     | +2y5         | 597.8         | 663.3         | 602.8         | 673.4         | 30.4        |
|                 |                            | <b>+2y4</b>  | <b>597.8</b>  | <b>550.3</b>  | <b>602.8</b>  | <b>560.3</b>  | <b>30.4</b> |
|                 |                            | <b>+2y8</b>  | <b>678.3</b>  | <b>1045.5</b> | <b>683.3</b>  | <b>1055.5</b> | <b>33.3</b> |
| <b>P4HA2</b>    | <b>YFEQLLEER</b>           | +2y4         | 678.3         | 562.2         | 683.3         | 572.3         | 33.3        |
|                 |                            | +2y3         | 678.3         | 433.2         | 683.3         | 443.2         | 33.3        |
|                 |                            | <b>+2y9</b>  | <b>649.8</b>  | <b>1074.6</b> | <b>654.8</b>  | <b>1084.6</b> | <b>32.3</b> |
| <b>PLG</b>      | <b>HSIFTPETNPR</b>         | +2y8         | 649.8         | 961.5         | 654.8         | 971.5         | 32.3        |
|                 |                            | +2y6         | 649.8         | 713.4         | 654.8         | 723.4         | 32.3        |
|                 |                            | <b>+2y9</b>  | <b>1029.5</b> | <b>1010.4</b> | <b>1033.5</b> | <b>1018.5</b> | <b>45.9</b> |
| <b>SERPINA1</b> | <b>LYHSEAF TVNFGDTEAK</b>  | +2y5         | 1029.5        | 577.3         | 1033.5        | 585.3         | 45.9        |
|                 |                            | +2b7         | 1029.5        | 848.4         | 1033.5        | 848.4         | 45.9        |
|                 |                            | <b>+2y11</b> | <b>954.5</b>  | <b>1005.5</b> | <b>958.5</b>  | <b>1013.5</b> | <b>43.2</b> |
| <b>SERPINA3</b> | <b>AVLDVFEEGTEASAATAVK</b> | +2y8         | 954.5         | 718.4         | 958.5         | 726.4         | 43.2        |
|                 |                            | +2b8         | 954.5         | 903.4         | 958.5         | 903.4         | 43.2        |
|                 |                            | +2y9         | 596.8         | 1008.5        | 601.8         | 1018.5        | 30.3        |
| <b>SERPINA4</b> | <b>IAPANADFAFR</b>         | +2y8         | 596.8         | 911.4         | 601.8         | 921.4         | 30.3        |
|                 |                            | <b>+2y7</b>  | <b>596.8</b>  | <b>840.4</b>  | <b>601.8</b>  | <b>850.4</b>  | <b>30.3</b> |
|                 |                            | +2y8         | 581.3         | 892.4         | 586.3         | 902.4         | 29.8        |
| <b>SERPINA5</b> | <b>AVVEVDESGTR</b>         | <b>+2y7</b>  | <b>581.3</b>  | <b>763.4</b>  | <b>586.3</b>  | <b>773.4</b>  | <b>29.8</b> |
|                 |                            | +2y6         | 581.3         | 664.3         | 586.3         | 674.3         | 29.8        |
|                 |                            | <b>+2y7</b>  | <b>638.4</b>  | <b>748.4</b>  | <b>642.4</b>  | <b>756.4</b>  | <b>31.8</b> |
| <b>SERPINE2</b> | <b>DIVTVANAVFVK</b>        | +2y3         | 638.4         | 393.3         | 642.4         | 401.3         | 31.8        |

|          |                     |              |              |               |              |               |             |
|----------|---------------------|--------------|--------------|---------------|--------------|---------------|-------------|
|          |                     | +2b9         | 638.4        | 883.5         | 642.4        | 883.5         | 31.8        |
|          |                     | +2y5         | 607.8        | 544.3         | 611.8        | 552.3         | 30.7        |
| SERPINF1 | ELLDTVTAPQK         | +2y4         | 607.8        | 443.3         | 611.8        | 451.3         | 30.7        |
|          |                     | <b>+2y3</b>  | <b>607.8</b> | <b>372.2</b>  | <b>611.8</b> | <b>380.2</b>  | <b>30.7</b> |
|          |                     | +2y8         | 977.0        | 870.6         | 981.0        | 878.6         | 44          |
| SERPINF2 | QLTSGPNQEQVSPLTLLK  | <b>+2y7</b>  | <b>977.0</b> | <b>771.5</b>  | <b>981.0</b> | <b>779.5</b>  | <b>44</b>   |
|          |                     | +2y6         | 977.0        | 684.5         | 981.0        | 692.5         | 44          |
|          |                     | <b>+2y9</b>  | <b>914.0</b> | <b>1055.6</b> | <b>919.0</b> | <b>1065.6</b> | <b>41.8</b> |
| SERPING1 | GVTSVSQIFHSPDLAIR   | +2y7         | 914.0        | 771.4         | 919.0        | 781.4         | 41.8        |
|          |                     | +2y4         | 914.0        | 472.3         | 919.0        | 482.3         | 41.8        |
|          |                     | +2y7         | 612.8        | 840.5         | 616.8        | 848.5         | 30.9        |
| SERPINH1 | GVVEVTHDLQK         | <b>+2y6</b>  | <b>612.8</b> | <b>741.4</b>  | <b>616.8</b> | <b>749.4</b>  | <b>30.9</b> |
|          |                     | +2b10        | 612.8        | 1078.6        | 616.8        | 1078.6        | 30.9        |
|          |                     | +2y9         | 617.3        | 901.5         | 622.3        | 911.5         | 31.1        |
| TIMP1    | GFQALGDAADIR        | +2y8         | 617.3        | 830.4         | 622.3        | 840.4         | 31.1        |
|          |                     | <b>+2y7</b>  | <b>617.3</b> | <b>717.4</b>  | <b>622.3</b> | <b>727.4</b>  | <b>31.1</b> |
|          |                     | +2y9         | 803.5        | 1013.6        | 807.5        | 1021.6        | 37.8        |
| ANXA1    | ALTGHLEEVVLALLK     | +2b6         | 803.5        | 593.3         | 807.5        | 593.3         | 37.8        |
|          |                     | <b>+2b10</b> | <b>803.5</b> | <b>1049.6</b> | <b>807.5</b> | <b>1049.6</b> | <b>37.8</b> |
|          |                     | +2y9         | 843.4        | 957.4         | 848.4        | 967.4         | 39.2        |
| ANXA11   | SLYHDISGDTSGDYR     | +2y6         | 843.4        | 698.3         | 848.4        | 708.3         | 39.2        |
|          |                     | <b>+2y2</b>  | <b>843.4</b> | <b>338.2</b>  | <b>848.4</b> | <b>348.2</b>  | <b>39.2</b> |
|          |                     | <b>+2y6</b>  | <b>556.3</b> | <b>755.4</b>  | <b>561.3</b> | <b>765.4</b>  | <b>28.9</b> |
| ANXA2    | QDIAFAYQR           | +2y5         | 556.3        | 684.3         | 561.3        | 694.4         | 28.9        |
|          |                     | +2y3         | 556.3        | 466.2         | 561.3        | 476.2         | 28.9        |
|          |                     | +2y9         | 833.9        | 971.6         | 837.9        | 979.6         | 38.9        |
| ANXA4    | SETSGSFEDALLAIVK    | +2y5         | 833.9        | 543.4         | 837.9        | 551.4         | 38.9        |
|          |                     | <b>+2y4</b>  | <b>833.9</b> | <b>430.3</b>  | <b>837.9</b> | <b>438.3</b>  | <b>38.9</b> |
|          |                     | +2y9         | 853.0        | 1003.6        | 858.0        | 1013.6        | 39.6        |
| ANXA5    | GLGTDEESILTLTSTR    | <b>+2y7</b>  | <b>853.0</b> | <b>803.5</b>  | <b>858.0</b> | <b>813.5</b>  | <b>39.6</b> |
|          |                     | +2y6         | 853.0        | 690.4         | 858.0        | 700.4         | 39.6        |
|          |                     | <b>+2y7</b>  | <b>588.8</b> | <b>744.5</b>  | <b>592.8</b> | <b>752.5</b>  | <b>30.1</b> |
| ANXA6    | DAFVAIVQSVK         | +2y5         | 588.8        | 560.3         | 592.8        | 568.4         | 30.1        |
|          |                     | +2b4         | 588.8        | 433.2         | 592.8        | 433.2         | 30.1        |
|          |                     | +2y9         | 845.9        | 956.6         | 850.9        | 966.6         | 39.3        |
| ANXA7    | GFGTDEQAIVDVVANR    | <b>+2y7</b>  | <b>845.9</b> | <b>772.4</b>  | <b>850.9</b> | <b>782.4</b>  | <b>39.3</b> |
|          |                     | +2y6         | 845.9        | 673.4         | 850.9        | 683.4         | 39.3        |
|          |                     | +2b2         | 964.5        | 262.1         | 968.5        | 262.1         | 43.6        |
| C1QC     | FNAVLTNPQG DYDTSTGK | <b>+2b3</b>  | <b>964.5</b> | <b>333.2</b>  | <b>968.5</b> | <b>333.2</b>  | <b>43.6</b> |
|          |                     | +2b4         | 964.5        | 432.2         | 968.5        | 432.2         | 43.6        |
|          |                     | <b>+2y6</b>  | <b>643.3</b> | <b>688.3</b>  | <b>648.3</b> | <b>698.3</b>  | <b>32</b>   |
| CLEC11A  | DAVQALQEAQGR        | +2b9         | 643.3        | 926.5         | 648.3        | 926.5         | 32          |

|                |                             |             |               |               |               |               |             |
|----------------|-----------------------------|-------------|---------------|---------------|---------------|---------------|-------------|
|                |                             | +2b10       | 643.3         | 1054.5        | 648.3         | 1054.5        | 32          |
|                |                             | <b>+2y8</b> | <b>933.5</b>  | <b>1050.5</b> | <b>938.5</b>  | <b>1060.5</b> | <b>42.5</b> |
| <b>CLEC3A</b>  | <b>FVDVNGIAISFLNWDR</b>     | +2y5        | 933.5         | 703.4         | 938.5         | 713.4         | 42.5        |
|                |                             | +2y4        | 933.5         | 590.3         | 938.5         | 600.3         | 42.5        |
|                |                             | <b>+2y8</b> | <b>657.4</b>  | <b>871.5</b>  | <b>661.4</b>  | <b>879.5</b>  | <b>32.5</b> |
| <b>CLEC3B</b>  | <b>LDTLAQEVALLK</b>         | +2y7        | 657.4         | 800.5         | 661.4         | 808.5         | 32.5        |
|                |                             | +2b3        | 657.4         | 330.2         | 661.4         | 330.2         | 32.5        |
|                |                             | +2y7        | 965.5         | 742.4         | 970.5         | 752.4         | 43.6        |
| <b>CSPG4</b>   | <b>ALLHVVAGGPWPQGATLR</b>   | <b>+2b5</b> | <b>965.5</b>  | <b>534.3</b>  | <b>970.5</b>  | <b>534.3</b>  | <b>43.6</b> |
|                |                             | +2b7        | 965.5         | 791.5         | 970.5         | 791.5         | 43.6        |
|                |                             | +2y7        | 571.8         | 820.5         | 575.8         | 828.5         | 29.4        |
| <b>HPX</b>     | <b>QGHNSVFLIK</b>           | +2y6        | 571.8         | 706.5         | 575.8         | 714.5         | 29.4        |
|                |                             | <b>+2y2</b> | <b>571.8</b>  | <b>260.2</b>  | <b>575.8</b>  | <b>268.2</b>  | <b>29.4</b> |
|                |                             | +2y6        | 538.7         | 776.4         | 543.7         | 786.4         | 28.3        |
| <b>LGALS1</b>  | <b>DGGAWGTEQR</b>           | <b>+2y5</b> | <b>538.7</b>  | <b>590.3</b>  | <b>543.7</b>  | <b>600.3</b>  | <b>28.3</b> |
|                |                             | +2b5        | 538.7         | 487.2         | 543.7         | 487.2         | 28.3        |
|                |                             | <b>+2y6</b> | <b>486.8</b>  | <b>744.4</b>  | <b>491.8</b>  | <b>754.4</b>  | <b>26.4</b> |
| <b>LMAN1</b>   | <b>DIDNLVQR</b>             | +2y3        | 486.8         | 402.2         | 491.8         | 412.3         | 26.4        |
|                |                             | +2b5        | 486.8         | 571.3         | 491.8         | 571.3         | 26.4        |
|                |                             | <b>+2y9</b> | <b>1092.6</b> | <b>903.5</b>  | <b>1096.6</b> | <b>911.5</b>  | <b>48.2</b> |
| <b>ANGPTL2</b> | <b>QIETLQQLVEVDGGIVSEVK</b> | +2y8        | 1092.6        | 788.5         | 1096.6        | 796.5         | 48.2        |
|                |                             | +2b9        | 1092.6        | 1053.6        | 1096.6        | 1053.6        | 48.2        |
|                |                             | +2y5        | 464.7         | 671.4         | 469.8         | 681.4         | 25.6        |
| <b>ANGPTL7</b> | <b>SGLVSFYR</b>             | <b>+2y4</b> | <b>464.7</b>  | <b>572.3</b>  | <b>469.8</b>  | <b>582.3</b>  | <b>25.6</b> |
|                |                             | +2y3        | 464.7         | 485.3         | 469.8         | 495.3         | 25.6        |
|                |                             | <b>+2y9</b> | <b>819.4</b>  | <b>1078.5</b> | <b>824.4</b>  | <b>1088.5</b> | <b>38.4</b> |
| <b>FGFBP2</b>  | <b>QGSTGEEFHFQTGGR</b>      | +2y8        | 819.4         | 949.5         | 824.4         | 959.5         | 38.4        |
|                |                             | +2b9        | 819.4         | 973.4         | 824.4         | 973.4         | 38.4        |
|                |                             | +2y9        | 586.4         | 945.5         | 590.4         | 953.5         | 30          |
| <b>FRZB</b>    | <b>LLLVEGSIAEK</b>          | +2y8        | 586.4         | 832.4         | 590.4         | 840.5         | 30          |
|                |                             | <b>+2y7</b> | <b>586.4</b>  | <b>733.4</b>  | <b>590.4</b>  | <b>741.4</b>  | <b>30</b>   |
|                |                             | +2y6        | 926.9         | 674.4         | 931.0         | 682.4         | 42.2        |
| <b>MST1</b>    | <b>WDLQHPHQHPFEPGK</b>      | <b>+2y3</b> | <b>926.9</b>  | <b>301.2</b>  | <b>931.0</b>  | <b>309.2</b>  | <b>42.2</b> |
|                |                             | +2b5        | 926.9         | 680.3         | 931.0         | 680.3         | 42.2        |
|                |                             | +2y9        | 846.4         | 978.5         | 850.5         | 986.5         | 39.3        |
| <b>S100A1</b>  | <b>ELLQTELSGFLDAQK</b>      | +2y8        | 846.4         | 865.4         | 850.5         | 873.5         | 39.3        |
|                |                             | <b>+2b2</b> | <b>846.4</b>  | <b>243.1</b>  | <b>850.5</b>  | <b>243.1</b>  | <b>39.3</b> |
|                |                             | <b>+2y8</b> | <b>604.8</b>  | <b>932.5</b>  | <b>608.8</b>  | <b>940.5</b>  | <b>30.6</b> |
| <b>S100A10</b> | <b>EFPGFLENQK</b>           | +2y5        | 604.8         | 631.3         | 608.8         | 639.4         | 30.6        |
|                |                             | +2y4        | 604.8         | 518.3         | 608.8         | 526.3         | 30.6        |
|                |                             | <b>+2y6</b> | <b>530.8</b>  | <b>725.4</b>  | <b>534.8</b>  | <b>733.4</b>  | <b>28</b>   |
| <b>S100A11</b> | <b>DGYNYTL SK</b>           | +2y5        | 530.8         | 611.3         | 534.8         | 619.4         | 28          |



|                |                        |             |              |              |              |              |             |
|----------------|------------------------|-------------|--------------|--------------|--------------|--------------|-------------|
|                |                        | +2y4        | 530.8        | 448.3        | 534.8        | 456.3        | 28          |
|                |                        | +2y9        | 624.3        | 1047.5       | 628.3        | 1055.5       | 31.3        |
| <b>S100A13</b> | <b>SLDVNQDSELK</b>     | +2y7        | 624.3        | 833.4        | 628.3        | 841.4        | 31.3        |
|                |                        | <b>+2b3</b> | <b>624.3</b> | <b>316.2</b> | <b>628.3</b> | <b>316.2</b> | <b>31.3</b> |
|                |                        | +2y6        | 455.2        | 693.4        | 459.2        | 701.4        | 25.2        |
| <b>S100A4</b>  | <b>TDEAAFQK</b>        | +2y5        | 455.2        | 564.3        | 459.2        | 572.3        | 25.2        |
|                |                        | <b>+2b2</b> | <b>455.2</b> | <b>217.1</b> | <b>459.2</b> | <b>217.1</b> | <b>25.2</b> |
|                |                        | <b>+2y6</b> | <b>458.2</b> | <b>674.3</b> | <b>463.3</b> | <b>684.4</b> | <b>25.4</b> |
| <b>S100A6</b>  | <b>LQDAEIAR</b>        | +2y5        | 458.2        | 559.3        | 463.3        | 569.3        | 25.4        |
|                |                        | +2b2        | 458.2        | 242.2        | 463.3        | 242.2        | 25.4        |
|                |                        | +2y5        | 482.2        | 645.3        | 487.2        | 655.4        | 26.2        |
| <b>S100A8</b>  | <b>GNFHAVYR</b>        | <b>+2y4</b> | <b>482.2</b> | <b>508.3</b> | <b>487.2</b> | <b>518.3</b> | <b>26.2</b> |
|                |                        | +2y3        | 482.2        | 437.3        | 487.2        | 447.3        | 26.2        |
|                |                        | +2y7        | 459.7        | 755.4        | 464.7        | 765.4        | 25.4        |
| <b>SCUBE1</b>  | <b>YALHSDGR</b>        | +2y6        | 459.7        | 684.3        | 464.7        | 694.4        | 25.4        |
|                |                        | <b>+2y5</b> | <b>459.7</b> | <b>571.3</b> | <b>464.7</b> | <b>581.3</b> | <b>25.4</b> |
|                |                        | <b>+2y8</b> | <b>587.3</b> | <b>958.6</b> | <b>591.3</b> | <b>966.6</b> | <b>30</b>   |
| <b>SFRP1</b>   | <b>SQYLLTAIHK</b>      | +2y7        | 587.3        | 795.5        | 591.3        | 803.5        | 30          |
|                |                        | +2y6        | 587.3        | 682.4        | 591.3        | 690.4        | 30          |
|                |                        | +2y9        | 706.3        | 839.4        | 711.3        | 849.4        | 34.3        |
| <b>ADIPOQ</b>  | <b>GDIGETGVPGAEGPR</b> | <b>+2y7</b> | <b>706.3</b> | <b>683.3</b> | <b>711.3</b> | <b>693.4</b> | <b>34.3</b> |
|                |                        | +2b8        | 706.3        | 729.3        | 711.3        | 729.3        | 34.3        |
|                |                        | +2y7        | 570.3        | 809.4        | 575.3        | 819.4        | 29.4        |
| <b>DPT</b>     | <b>GATTTFAVER</b>      | <b>+2y6</b> | <b>570.3</b> | <b>708.4</b> | <b>575.3</b> | <b>718.4</b> | <b>29.4</b> |
|                |                        | +2y5        | 570.3        | 561.3        | 575.3        | 571.3        | 29.4        |

NOTE: Endogenous peptides (light) and isotope-labeled peptides (heavy) were chosen to measure the target proteins of interest. C-terminal peptides (arginine [R] or lysine [K]) were labeled with the <sup>13</sup>C<sup>15</sup>N heavy isotope. Quantitative ion is marked in bold font.
