# Supplementary material for: Proteomic Analysis of the Meniscus Cartilage in Osteoarthritis
Source: MDPI journal article supplement (doi:10.3390/ijms22158181), 2021-07-30
Supplement: s1 [file s1]

**Supplementary Table S4.** The statistics results of MRM results.

| Gene Name | Peak Area Ratios  |                    |       |                  |                    |       | <i>P</i> -values |
|-----------|-------------------|--------------------|-------|------------------|--------------------|-------|------------------|
|           | Lateral M. (n=12) |                    |       | Medial M. (n=12) |                    |       |                  |
|           | Median            | 95% CI             | SD    | Median           | 95% CI             | SD    | L vs. M          |
| A2M       | 4.0               | 3.435 to 6.516     | 58.3  | 11.7             | 5.033 to 18.811    | 81.0  | 0.339            |
| ABI3BP    | 24.5              | 19.539 to 45.522   | 83.1  | 26.3             | 20.446 to 51.619   | 19.4  | 0.720            |
| ACAN      | 219.5             | 112.859 to 356.003 | 133.7 | 185.2            | 114.707 to 351.088 | 142.5 | 0.346            |
| ADIPOQ    | 119.3             | 98.197 to 156.065  | 49.9  | 181.0            | 106.322 to 321.616 | 133.6 | 0.045            |
| AEBP1     | 19.6              | 16.907 to 24.948   | 62.4  | 18.0             | 14.017 to 25.151   | 8.3   | 0.206            |
| AGT       | 3.8               | 3.300 to 4.900     | 8.7   | 11.7             | 4.612 to 18.461    | 79.8  | 0.072            |
| AMBP      | 3.9               | 3.069 to 5.065     | 23.2  | 11.7             | 5.236 to 17.678    | 82.7  | 0.370            |
| ANGPTL2   | 27.7              | 11.617 to 47.564   | 20.4  | 34.5             | 15.717 to 60.003   | 24.0  | 0.208            |
| ANGPTL7   | 12.7              | 7.390 to 18.448    | 27.5  | 20.9             | 9.852 to 47.977    | 20.9  | 0.352            |
| ANXA1     | 84.5              | 56.885 to 115.642  | 35.8  | 110.1            | 47.493 to 162.478  | 61.9  | 0.592            |
| ANXA2     | 153.5             | 105.100 to 188.043 | 51.5  | 143.7            | 120.415 to 216.994 | 116.2 | 0.753            |
| ANXA4     | 271.2             | 210.798 to 354.665 | 82.2  | 313.5            | 100.866 to 463.536 | 185.5 | 0.722            |
| ANXA5     | 143.6             | 105.154 to 163.748 | 596.8 | 155.6            | 114.050 to 240.632 | 119.9 | 0.959            |
| ANXA6     | 6.0               | 4.317 to 9.214     | 78.8  | 11.0             | 6.097 to 14.393    | 4.3   | 0.666            |
| ANXA7     | 1.9               | 1.335 to 4.031     | 2.8   | 4.1              | 2.537 to 5.268     | 1.8   | 0.157            |
| ASPN      | 187.5             | 68.271 to 329.361  | 142.9 | 184.6            | 110.091 to 365.012 | 145.4 | 0.937            |
| BGN       | 72.9              | 42.548 to 99.993   | 32.6  | 77.6             | 49.813 to 189.733  | 186.8 | 0.119            |
| C1QC      | 11.4              | 6.767 to 21.815    | 25.6  | 26.6             | 15.668 to 44.455   | 14.8  | 0.153            |
| CHAD      | 70.9              | 48.125 to 103.898  | 49.6  | 75.8             | 56.200 to 179.391  | 182.8 | 0.286            |
| CILP      | 22.1              | 19.986 to 26.547   | 39.3  | 17.7             | 14.442 to 30.324   | 9.7   | 0.317            |
| CLEC3B    | 6.6               | 5.735 to 11.214    | 46.8  | 10.5             | 6.886 to 14.220    | 3.8   | 0.414            |
| COL14A1   | 21.1              | 13.321 to 28.324   | 20.6  | 4.2              | 2.100 to 56.034    | 41.3  | 0.559            |
| COL15A1   | 17.6              | 12.673 to 35.252   | 50.6  | 3.1              | 1.517 to 50.606    | 40.9  | 0.469            |
| COL18A1   | 20.4              | 11.104 to 30.744   | 24.0  | 37.9             | 2.335 to 92.531    | 52.3  | 0.017            |
| COL6A1    | 22.5              | 17.225 to 29.354   | 14.9  | 26.4             | 19.446 to 49.470   | 19.8  | 0.587            |

|         |       |                    |       |       |                    |       |       |
|---------|-------|--------------------|-------|-------|--------------------|-------|-------|
| COL6A3  | 22.3  | 17.839 to 43.286   | 23.2  | 24.7  | 20.101 to 52.620   | 19.7  | 0.858 |
| COMP    | 23.5  | 19.032 to 25.962   | 199.8 | 20.0  | 14.286 to 32.530   | 10.7  | 0.589 |
| CSTB    | 11.5  | 9.238 to 17.796    | 31.1  | 43.7  | 15.664 to 85.994   | 252.9 | 0.046 |
| CTSD    | 14.0  | 9.415 to 19.283    | 36.7  | 41.9  | 15.588 to 83.927   | 263.0 | 0.045 |
| CTSZ    | 11.3  | 9.535 to 18.375    | 34.2  | 44.0  | 16.302 to 78.582   | 249.8 | 0.047 |
| DPT     | 146.4 | 119.025 to 192.753 | 43.5  | 203.5 | 111.939 to 351.656 | 137.6 | 0.116 |
| F2      | 8.4   | 4.504 to 17.764    | 8.6   | 25.6  | 5.221 to 90.277    | 80.2  | 0.059 |
| FBLN1   | 10.7  | 6.176 to 18.185    | 36.3  | 9.2   | 5.707 to 11.762    | 3.8   | 0.084 |
| FBLN2   | 6.6   | 4.604 to 13.827    | 6.0   | 8.3   | 5.317 to 10.631    | 3.7   | 0.705 |
| FGB     | 7.7   | 5.804 to 16.044    | 7.1   | 10.0  | 5.756 to 13.331    | 4.6   | 0.206 |
| FGG     | 10.8  | 4.456 to 19.916    | 10.8  | 13.4  | 7.053 to 17.765    | 7.4   | 0.584 |
| FN1     | 15.7  | 5.804 to 25.993    | 14.3  | 15.8  | 7.522 to 18.062    | 7.1   | 0.327 |
| FRZB    | 11.1  | 2.218 to 17.393    | 23.8  | 5.9   | 2.638 to 9.014     | 4.3   | 0.047 |
| HPX     | 1.6   | 0.752 to 6.282     | 7.1   | 5.9   | 2.769 to 9.549     | 4.0   | 0.102 |
| HRG     | 6.7   | 1.856 to 21.384    | 9.6   | 32.6  | 4.920 to 112.970   | 91.9  | 0.176 |
| HTRA1   | 15.6  | 4.206 to 32.479    | 21.5  | 60.6  | 10.333 to 114.638  | 87.7  | 0.083 |
| ITIH1   | 16.1  | 12.273 to 31.432   | 18.8  | 16.2  | 12.567 to 26.796   | 10.6  | 0.854 |
| KNG1    | 18.2  | 11.652 to 53.189   | 34.4  | 15.0  | 12.859 to 25.579   | 10.8  | 0.049 |
| LGALS1  | 12.8  | 10.842 to 22.330   | 15.2  | 16.9  | 15.686 to 23.083   | 6.4   | 0.426 |
| LMAN1   | 14.5  | 8.535 to 25.020    | 9.9   | 27.5  | 10.406 to 50.093   | 19.4  | 0.024 |
| LTBP2   | 22.7  | 8.559 to 39.098    | 26.0  | 19.8  | 12.784 to 26.013   | 9.1   | 0.151 |
| LUM     | 69.2  | 41.110 to 95.044   | 30.6  | 71.2  | 47.080 to 175.816  | 165.2 | 0.195 |
| MATN2   | 51.6  | 24.883 to 95.079   | 64.3  | 62.7  | 23.782 to 74.583   | 29.9  | 1.000 |
| MFGE8   | 62.0  | 30.140 to 126.459  | 77.4  | 66.7  | 29.949 to 89.395   | 36.6  | 0.553 |
| MGP     | 72.3  | 23.484 to 127.995  | 81.7  | 79.2  | 34.839 to 99.635   | 44.5  | 0.755 |
| OGN     | 1.6   | 0.704 to 3.954     | 67.9  | 1.0   | 0.152 to 2.379     | 1.7   | 0.180 |
| PCOLCE  | 33.6  | 24.591 to 63.403   | 78.9  | 50.1  | 25.181 to 122.655  | 61.6  | 0.755 |
| PLG     | 26.1  | 16.152 to 30.258   | 10.6  | 21.6  | 17.681 to 28.366   | 9.3   | 0.003 |
| PRG4    | 1.6   | 1.217 to 3.365     | 6.3   | 1.0   | 0.447 to 3.273     | 1.5   | 0.180 |
| S100A1  | 9.9   | 4.346 to 20.051    | 8.9   | 6.8   | 3.074 to 10.283    | 4.1   | 0.006 |
| S100A10 | 7.7   | 5.317 to 14.731    | 6.2   | 7.5   | 3.330 to 9.826     | 3.9   | 0.005 |

|          |       |                    |       |       |                    |       |       |
|----------|-------|--------------------|-------|-------|--------------------|-------|-------|
| S100A11  | 12.4  | 10.769 to 15.641   | 10.1  | 12.2  | 7.684 to 15.241    | 6.4   | 0.317 |
| S100A13  | 11.6  | 9.969 to 14.431    | 2.6   | 14.1  | 8.504 to 19.672    | 6.1   | 0.005 |
| S100A4   | 6.2   | 4.369 to 9.654     | 48.0  | 7.8   | 4.704 to 12.724    | 5.6   | 0.763 |
| S100A6   | 154.9 | 117.629 to 190.838 | 92.9  | 199.8 | 113.263 to 340.135 | 138.3 | 0.239 |
| SERPINA1 | 4.1   | 2.017 to 7.154     | 12.5  | 3.8   | 2.238 to 5.644     | 3.7   | 0.206 |
| SERPINA3 | 24.5  | 1.159 to 38.832    | 24.0  | 29.2  | 12.586 to 48.526   | 17.1  | 0.011 |
| SERPINA4 | 4.8   | 2.352 to 7.620     | 3.7   | 4.3   | 2.817 to 6.200     | 3.4   | 0.705 |
| SERPINA5 | 20.2  | 14.069 to 52.409   | 22.0  | 21.1  | 10.780 to 31.365   | 11.7  | 0.245 |
| SERPINF1 | 22.6  | 13.604 to 55.641   | 42.3  | 22.3  | 12.149 to 32.348   | 12.5  | 0.246 |
| SERPING1 | 21.7  | 15.528 to 53.949   | 22.0  | 22.7  | 13.363 to 37.768   | 13.1  | 0.408 |
| SERPINH1 | 77.3  | 50.278 to 112.844  | 39.3  | 110.9 | 55.686 to 151.427  | 55.9  | 0.167 |
| SMOC1    | 31.5  | 12.838 to 45.927   | 25.7  | 56.6  | 37.032 to 115.747  | 58.8  | 0.082 |
| SMOC2    | 37.8  | 8.944 to 60.586    | 25.4  | 85.9  | 43.725 to 131.630  | 65.1  | 0.032 |
| SRPX2    | 34.3  | 8.878 to 64.960    | 28.1  | 24.7  | 5.881 to 29.614    | 12.5  | 0.089 |
| THBS1    | 25.5  | 9.054 to 66.608    | 29.8  | 25.4  | 7.594 to 31.889    | 13.3  | 0.227 |
| THBS2    | 50.8  | 12.474 to 103.505  | 46.3  | 37.6  | 17.042 to 49.996   | 19.7  | 0.168 |
| TIMP1    | 89.4  | 59.288 to 138.750  | 79.4  | 114.5 | 55.236 to 165.966  | 62.8  | 0.723 |
| VCAN     | 2.5   | 1.600 to 4.410     | 45.6  | 1.9   | 0.595 to 3.508     | 1.9   | 0.180 |
| VTN      | 190.6 | 94.396 to 322.248  | 122.6 | 178.2 | 105.156 to 343.316 | 132.1 | 0.844 |
